# Supplementary material for: Cashew nut (Anacardium occidentale L.) and cashew nut oil reduce cardiovascular risk factors in adults on weight-loss treatment: a randomized controlled three-arm trial (Brazilian Nuts Study)
Source: PubMed Central journal article supplement (PMC11234893; doi:10.3389/fnut.2024.1407028), 2024-06-26
Supplement: Image_1.pdf [file Image_1.pdf]

## Supplementary Material

### 1 Supplementary Figures

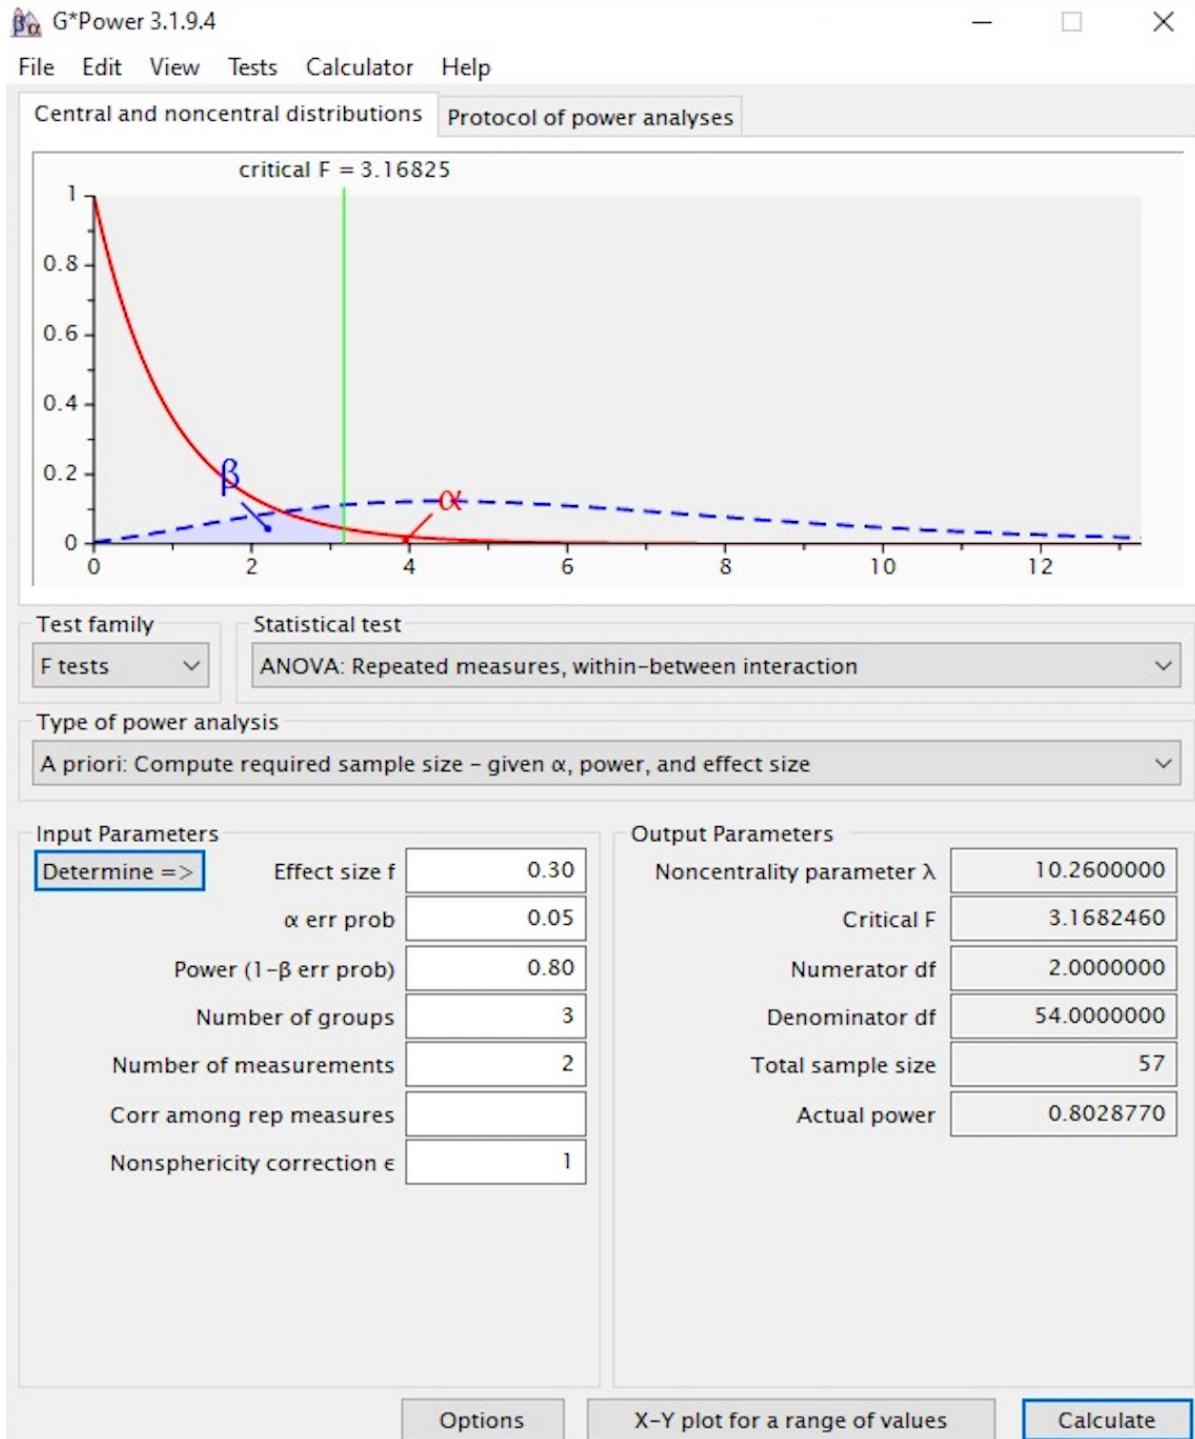

Supplementary Figure 1. Result of sample size calculation according to G\*Power 3.1 program.

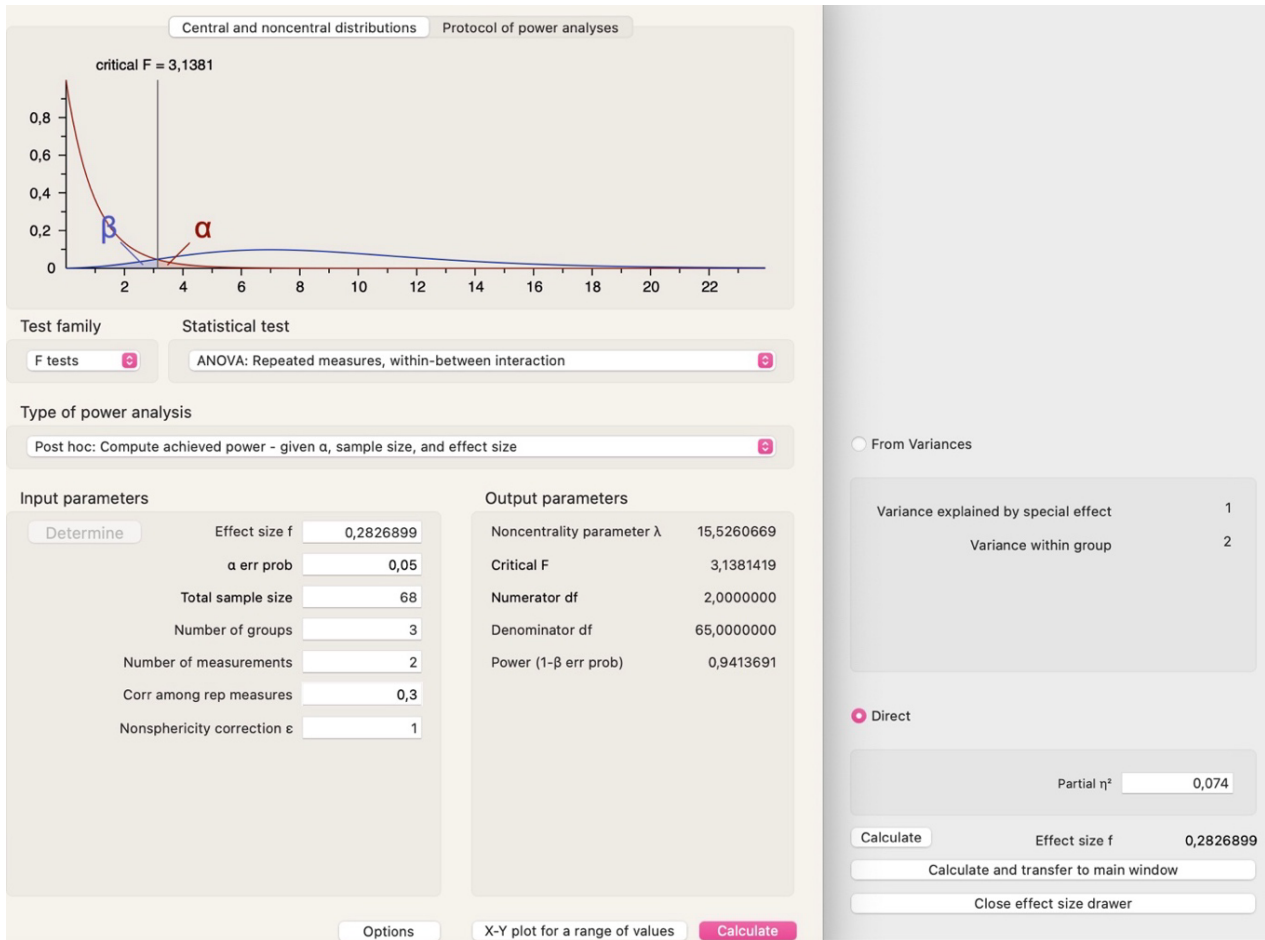

Supplementary figure 2. Study power calculation according to G\*Power 3.1 program.

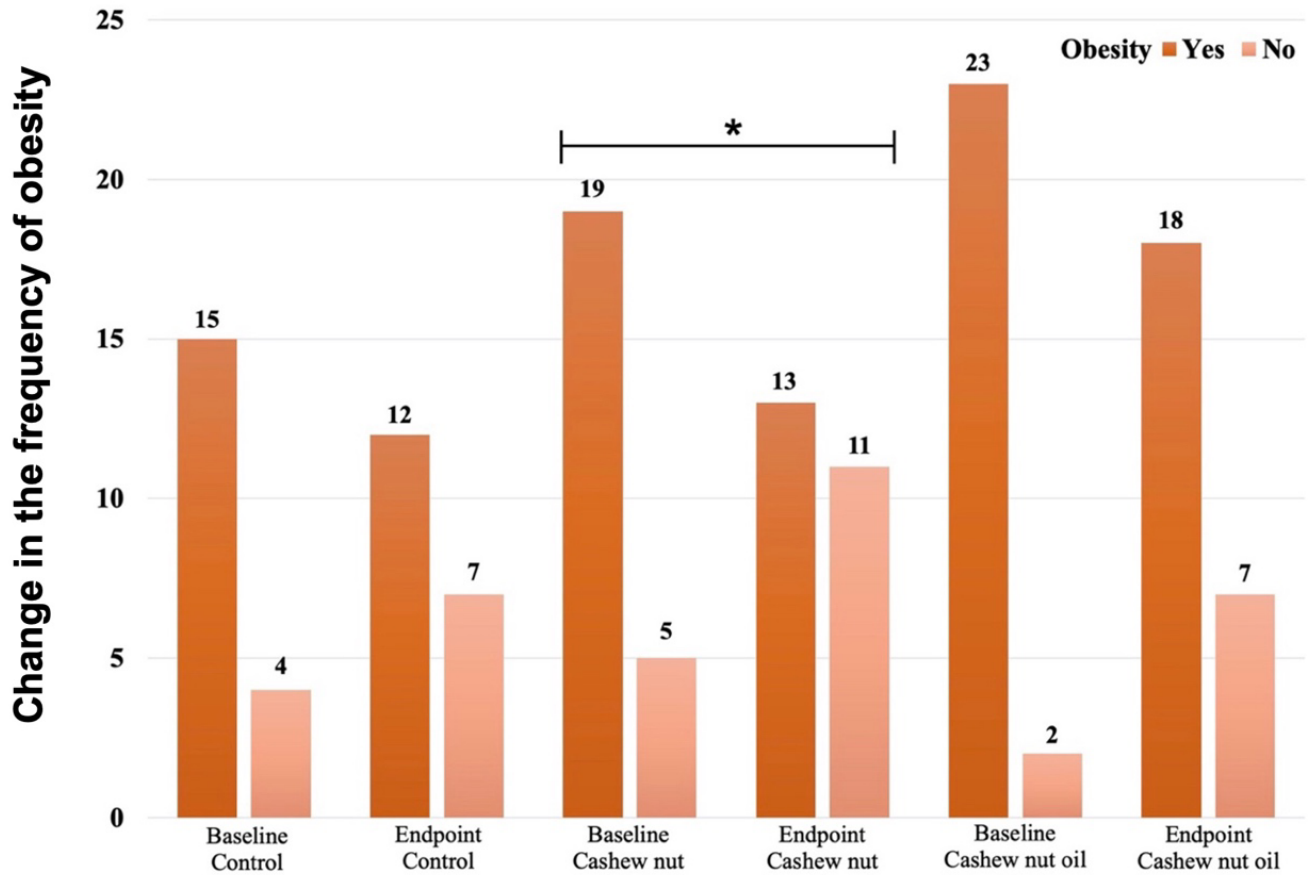

**Supplementary Figure 3.** Individuals with obesity according 8-wk energy-restricted groups (cashew nut, control, cashew nut oil). McNemar's test ( $p < 0.05$  within-group).
